# Supplementary material for: Nuclear Pore Proteins Nup153 and Megator Define Transcriptionally Active Regions in the Drosophila Genome
Source: PubMed Central journal article supplement (PMC2820533; doi:10.1371/journal.pgen.1000846), 2010-02-12

# Supplementary Figure 5

A

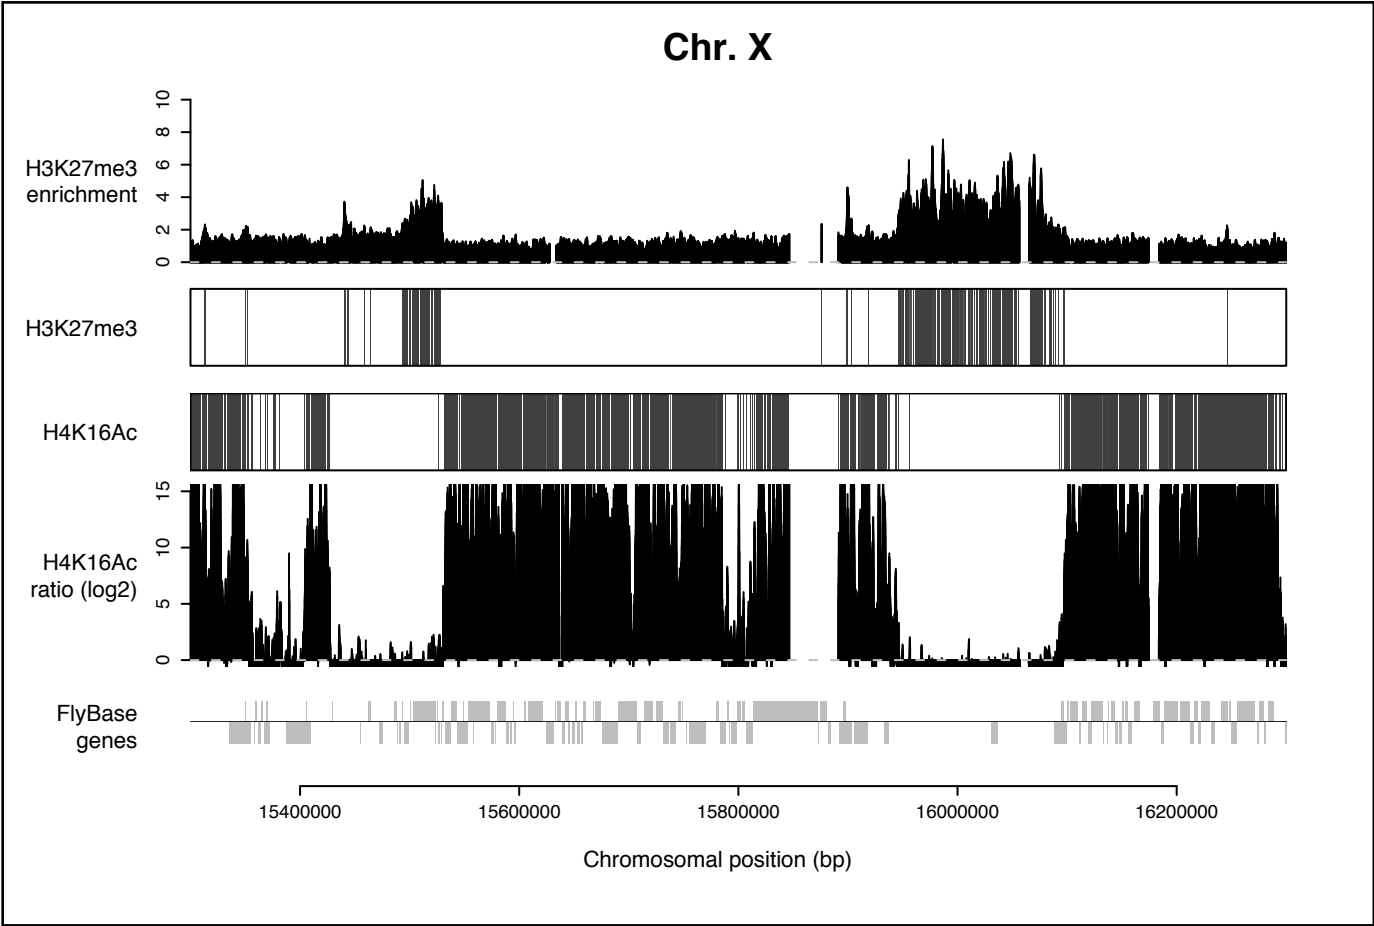

B

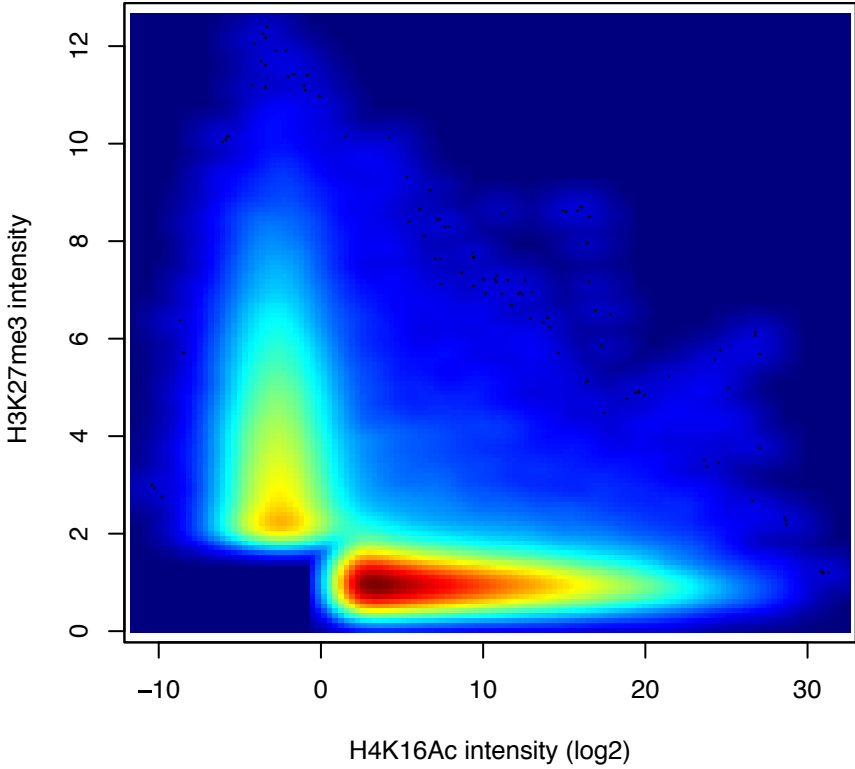

Supplement: pgen.1000846.s005.pdf [file pgen.1000846.s005.pdf]
